# Supplementary material for: Bridged poly(1-imidazolyl)borate silver(I) complexes containing tertiary mono(phosphine) ligands. The first structurally authenticated bis(imidazolyl)borate metal complex †
Source: Royal Society of Chemistry journal article supplement (doi:10.1039/b008135n), 2001-01-01
Supplement: b008135n.doc [file b008135n.doc]

**Spectral and Conductivity data for compounds 1-10**

**[K{H2B(im)2}.(DMAC)] (1).** IR (nujol, cm-1): 3118w, 3097w (CH), 2371m, 2356m, 2266m, 2249m (BH), 1698m, 1620sbr (CO), 1568sh, 1556w (C...C,C...N).

**[{(Ph)3P}2Ag{(im)2BH2}] (2).** IR (nujol, cm-1): 3130w, 3094w (CH), 2406s, 2372s, 2281m, 2210 (BH), 1585m, 1502sh (C...C,C...N), 513s, 498s, 439m (PPh3), 410w, 397w, 352w, 324w, 310w, 280w, 247w, 224w, 210w. m (CH2Cl2, 0.01M): 0.3 -1mol2cm-1. m (Acetone, 0.005M): 2.3 -1mol2cm-1.

**[{(*p*-tol)3P}2Ag{(im)2BH2}] (3).** IR (nujol, cm-1): 3131w (CH), 2373s, 2273m (BH), 1596m (C...C,C...N), 516s, 499s, 446w (PAr3), 351w, 317m, 280m, 255w, 205w.m (CH2Cl2, 0.008M): 0.5 -1mol2cm-1. m (Acetone, 0.005M): 1.6 -1mol2cm-1.

**[{(cy)3P}Ag{(im)2BH2}]n (4).** IR (nujol, cm-1): 3129w, 3104 (CH), 2380s, 2340sh, 2266m (BH), 1595w, 1581m, 1508sh (C...C,C...N), 515s, 473m, 451sh (cy3P), 406w, 386w, 335w, 324m. m (CH2Cl2, 0.007M): 0.6 -1mol2cm-1. m (Acetone, 0.005M): 2.6 -1mol2cm-1.

**[{(Ph)3P}Ag{B(im)4}] (5).** IR (nujol, cm-1): 3142w, 3120w, 3099w (CH), 1586w, 1528w (C...C,C...N), 522s, 501s, 493s (PPh3), 444w, 433w, 420w, 398w, 350w, 328w. m (CH2Cl2, 0.008M): 0.7 -1mol2cm-1. m (Acetone, 0.009 M): 1.9 -1mol2cm-1.

**[{(*m*-tol)3P}2Ag{B(im)4}] (6).** IR (nujol, cm-1): 3117w, 3052w (CH), 1590w, 1551w (C...C,C...N), 545s, 520sh, 450s, 427sh (PPh3), 353w, 327w, 280, 247w. m (CH2Cl2, 0.008M): 0.4 -1mol2cm-1. m (Acetone, 0.011 M): 4.1 -1mol2cm-1.

**[{(*p*-tol)3P}2Ag{B(im)4}] (7).** IR (nujol, cm-1): 3101w, 3068w (CH); 1596m, 1500sh (C...C,C...N), 514s, 431m (PAr3), 353w, 319w. m (CH2Cl2, 0.008M): 1.1 -1mol2cm-1. m (Acetone, 0.008M): 1.7 -1mol2cm-1.

**[{(MePh2)P}2Ag{B(im)4}] (8).** . IR (nujol, cm-1): 3110w, 3060w (CH), 1584m (C...C, C...N); 508s, 478m, 472m, 455w (PRPh2), 325w, 280w. m (CH2Cl2, 0.015M): 1.2 -1mol2cm-1. m (Acetone, 0.009M): 1.5 -1mol2cm-1.

**[{(EtPh2)P}2Ag{B(im)4}] (9).** IR (nujol, cm-1): 3090w (CH), 1586w (C...C, C...N), 552s, 540sh, 475w, 467w (PEtPh2), 397w, 353w, 325w, 279m, 247s, 227s. m (CH2Cl2, 0.005M): 0.2 -1mol2cm-1. m (Acetone, 0.001M): 1.1 -1mol2cm-1.

**[{(cy)3P}2Ag{B(im)4}] (10).** IR (nujol, cm-1): 3140wbr, 3113w (CH), 1590w (C...C,C...N), 564m, 546m, 533w, 510s, 487m, 469s (Cy3P), 399m, 384m, 350w, 326w, 225w. m (CH2Cl2, 0.01M): 0.2 -1mol2cm-1. m (Acetone, 0.005M): 1.6 -1mol2cm-1.
